# Supplementary material
Source: PubMed Central journal article supplement (PMC3078823)
Supplement: NIHMS260514-supplement-1.pdf [file NIHMS260514-supplement-1.pdf]

Table S1. Total protein concentration for lectin-enriched sample pools as determined by bicinchoninic acid (BCA) UV assay.

| <b>Group</b>              | <b>Trial 1</b> | <b>Trial 2</b> | <b>Trial 3</b> | <b>Conc. (mg/mL)</b> | <b>Std. Dev. (mg/mL)</b> | <b>CV (%)</b> |
|---------------------------|----------------|----------------|----------------|----------------------|--------------------------|---------------|
| Esophageal Adenocarcinoma | 1.25           | 1.34           | 1.31           | 1.30                 | 0.05                     | 3.61          |
| High Grade Dysplasia      | 1.77           | 1.79           | 1.82           | 1.79                 | 0.03                     | 1.40          |
| Disease Free              | 1.16           | 1.18           | 1.17           | 1.17                 | 0.01                     | 0.82          |

Table S2. Quantified glycoproteins and CVs for triplicate LC-MS/MS measurements.

| <u>Protein Description</u>                                           | <u>Disease Free (DF)</u> |               | <u>High Grade<br/>Dysplasia (HGD)</u> |               | <u>Esophageal<br/>Adenocarcinoma (EAC)</u> |               |
|----------------------------------------------------------------------|--------------------------|---------------|---------------------------------------|---------------|--------------------------------------------|---------------|
|                                                                      | <u>Protein Signal</u>    | <u>CV (%)</u> | <u>Protein Signal</u>                 | <u>CV (%)</u> | <u>Protein Signal</u>                      | <u>CV (%)</u> |
| 14-3-3 protein theta                                                 | 3.30E-03                 | 29.96         | 3.93E-03                              | 7.34          | 1.75E-03                                   | 32.88         |
| Alpha-1-acid glycoprotein 1                                          | 2.96E-01                 | 0.43          | 1.70E-01                              | 1.24          | 4.08E-01                                   | 2.29          |
| Alpha-1-antitrypsin                                                  | 6.30E-02                 | 0.13          | 7.26E-02                              | 1.37          | 7.69E-02                                   | 1.89          |
| Alpha-1B-glycoprotein                                                | 1.49E-01                 | 1.57          | 1.67E-01                              | 0.80          | 1.81E-01                                   | 1.26          |
| Alpha-2-antiplasmin                                                  | 2.60E-02                 | 4.23          | 3.32E-02                              | 12.15         | 2.29E-02                                   | 1.96          |
| Leucine-rich alpha-2-glycoprotein                                    | 9.60E-03                 | 4.35          | 7.27E-03                              | 1.67          | 1.01E-02                                   | 1.49          |
| Alpha-2-macroglobulin                                                | 4.67E-01                 | 0.24          | 5.31E-01                              | 1.53          | 6.01E-01                                   | 0.55          |
| Alpha-1-antichymotrypsin                                             | 4.69E-01                 | 0.47          | 2.56E-01                              | 1.71          | 3.11E-01                                   | 2.36          |
| Actin                                                                | 5.79E-03                 | 2.47          | 5.19E-03                              | 7.88          | 1.14E-02                                   | 2.31          |
| Afamin                                                               | 6.70E-02                 | 1.08          | 8.35E-02                              | 1.22          | 6.59E-02                                   | 0.42          |
| Insulin-like growth factor-binding protein complex acid labile chain | 1.70E-02                 | 2.69          | 1.25E-02                              | 1.99          | 1.28E-02                                   | 2.99          |
| Alpha-1 microglycoprotein                                            | 6.33E-02                 | 0.85          | 7.31E-02                              | 3.90          | 9.56E-02                                   | 2.31          |
| Angiotensinogen                                                      | 2.72E-02                 | 0.24          | 2.26E-02                              | 7.13          | 3.04E-02                                   | 1.22          |

|                                       |          |      |          |      |          |      |
|---------------------------------------|----------|------|----------|------|----------|------|
| Antithrombin-III                      | 3.58E-01 | 0.74 | 2.79E-01 | 0.15 | 2.94E-01 | 0.50 |
| Apolipoprotein A-I                    | 1.13E+00 | 0.19 | 1.26E+00 | 0.11 | 1.21E+00 | 0.20 |
| Apolipoprotein A-II                   | 8.40E-02 | 4.28 | 5.73E-02 | 0.78 | 8.70E-02 | 1.65 |
| Apolipoprotein A-IV                   | 1.60E-01 | 0.67 | 1.38E-01 | 0.91 | 1.39E-01 | 0.95 |
| Apolipoprotein B-100                  | 4.76E-03 | 2.27 | 4.84E-03 | 8.16 | 3.38E-03 | 4.27 |
| Apolipoprotein C-I                    | 2.92E-02 | 0.30 | 3.73E-02 | 1.97 | 4.19E-02 | 0.43 |
| Apolipoprotein C-II                   | 2.02E-02 | 1.36 | 1.62E-02 | 1.54 | 2.10E-02 | 1.47 |
| Apolipoprotein C-III                  | 4.25E-02 | 0.71 | 3.20E-02 | 0.79 | 5.65E-02 | 1.04 |
| Apolipoprotein D                      | 4.03E-02 | 1.24 | 3.82E-02 | 0.89 | 4.32E-02 | 2.65 |
| Apolipoprotein E                      | 2.48E-02 | 1.55 | 3.16E-02 | 0.98 | 2.45E-02 | 2.58 |
| Beta-2-glycoprotein 1                 | 1.13E-01 | 0.99 | 2.23E-01 | 0.54 | 2.63E-01 | 0.64 |
| Apolipoprotein L1                     | 8.14E-03 | 2.69 | 5.44E-03 | 5.12 | 6.61E-03 | 4.72 |
| Apolipoprotein M                      | 2.35E-02 | 4.44 | 1.33E-02 | 2.26 | 2.03E-02 | 5.85 |
| Attractin                             | 5.75E-03 | 0.36 | 5.22E-03 | 2.04 | 7.59E-03 | 0.68 |
| Beta-2-microglobulin                  | 6.77E-03 | 5.85 | 4.12E-03 | 1.34 | 5.26E-03 | 3.40 |
| Complement C1q subcomponent subunit B | 3.56E-02 | 0.95 | 4.19E-02 | 0.99 | 4.29E-02 | 1.24 |
| Complement C1q subcomponent subunit C | 1.63E-03 | 3.73 | 1.71E-03 | 2.26 | 1.75E-03 | 4.74 |

|                                                         |          |       |          |       |          |       |
|---------------------------------------------------------|----------|-------|----------|-------|----------|-------|
| Complement C1r subcomponent                             | 3.98E-02 | 0.60  | 4.07E-02 | 0.70  | 3.08E-02 | 1.53  |
| Complement C1s subcomponent                             | 3.62E-02 | 1.32  | 5.51E-02 | 1.10  | 6.66E-02 | 1.27  |
| C4b-binding protein alpha chain                         | 3.07E-01 | 0.35  | 3.10E-01 | 0.86  | 2.99E-01 | 0.51  |
| C4b-binding protein beta chain                          | 1.13E-02 | 1.54  | 1.53E-02 | 2.21  | 1.48E-02 | 0.85  |
| Uncharacterized protein C1orf83                         | 7.27E-03 | 0.89  | 6.05E-03 | 4.75  | 5.33E-03 | 1.28  |
| Corticosteroid-binding globulin                         | 2.83E-03 | 9.77  | 2.65E-03 | 2.54  | 1.80E-03 | 5.10  |
| CD5 antigen-like                                        | 1.09E-03 | 27.76 | 1.29E-03 | 20.01 | 5.93E-04 | 31.19 |
| Cytidine and dCMP deaminase domain-containing protein 1 | 2.06E-04 | 9.88  | 3.92E-04 | 3.94  | 3.08E-04 | 4.45  |
| Ceruloplasmin                                           | 3.91E-01 | 2.18  | 4.64E-01 | 2.24  | 3.88E-01 | 0.62  |
| Glycine-rich beta glycoprotein                          | 9.26E-02 | 2.59  | 7.33E-02 | 1.82  | 7.72E-02 | 2.49  |
| Complement factor H                                     | 4.08E-01 | 0.55  | 4.73E-01 | 0.08  | 3.88E-01 | 1.65  |
| Complement factor I                                     | 7.10E-02 | 1.16  | 5.43E-02 | 3.47  | 5.04E-02 | 0.44  |
| Clusterin                                               | 6.93E-02 | 3.39  | 6.71E-02 | 1.06  | 7.61E-02 | 0.74  |
| Centrobin                                               | 7.35E-03 | 1.57  | 1.17E-02 | 4.53  | 1.80E-03 | 2.30  |
| Collagen alpha-1(I) chain                               | 2.40E-03 | 2.21  | 5.13E-03 | 2.19  | 9.00E-03 | 0.92  |
| Complement C3                                           | 1.10E+00 | 1.30  | 1.15E+00 | 0.40  | 1.38E+00 | 0.30  |
| Complement C4-A                                         | 2.37E-01 | 1.62  | 2.64E-01 | 1.77  | 2.48E-01 | 0.43  |

|                                         |          |       |          |       |          |       |
|-----------------------------------------|----------|-------|----------|-------|----------|-------|
| Complement C4-B                         | 2.73E-01 | 0.81  | 2.92E-01 | 1.90  | 3.01E-01 | 0.87  |
| Complement C5                           | 2.31E-02 | 9.75  | 2.88E-02 | 2.58  | 3.03E-02 | 2.97  |
| Complement component C6                 | 1.20E-01 | 1.31  | 1.21E-01 | 0.93  | 1.30E-01 | 0.55  |
| Complement component C7                 | 4.21E-02 | 2.68  | 3.38E-02 | 1.32  | 4.69E-02 | 1.74  |
| Complement component C8 alpha chain     | 1.07E-01 | 3.20  | 1.14E-01 | 0.64  | 8.14E-02 | 1.92  |
| Complement component C8 beta chain      | 9.58E-02 | 0.71  | 1.09E-01 | 1.96  | 1.01E-01 | 0.45  |
| Complement component C8 gamma chain     | 3.09E-02 | 1.99  | 3.66E-02 | 2.26  | 3.42E-02 | 2.91  |
| Complement component C9                 | 1.77E-01 | 0.66  | 1.74E-01 | 0.67  | 1.79E-01 | 0.38  |
| Cullin-7                                | 2.26E-03 | 8.09  | 7.59E-04 | 2.57  | 1.25E-03 | 2.95  |
| Cystatin-C                              | 3.40E-02 | 2.21  | 4.27E-02 | 1.65  | 3.79E-02 | 1.35  |
| Dermcidin                               | 1.22E-02 | 2.35  | 1.68E-02 | 1.28  | 8.78E-03 | 3.63  |
| Docking protein 3                       | 9.88E-04 | 5.98  | 1.45E-03 | 12.13 | 1.45E-03 | 0.68  |
| Dual specificity protein phosphatase 14 | 5.39E-04 | 22.42 | 7.09E-04 | 18.30 | 5.25E-04 | 25.13 |
| Dynein heavy chain 10, axonemal         | 1.67E-03 | 9.16  | 3.48E-04 | 5.85  | 3.19E-03 | 5.30  |
| Extracellular matrix protein 1          | 2.31E-02 | 5.11  | 1.18E-02 | 4.13  | 1.82E-02 | 3.84  |
| EMILIN-2                                | 7.81E-03 | 0.28  | 1.59E-02 | 1.60  | 2.00E-02 | 2.15  |
| Coagulation factor XII                  | 4.71E-02 | 1.03  | 4.97E-02 | 1.22  | 4.61E-02 | 2.65  |

|                                        |          |       |          |       |          |       |
|----------------------------------------|----------|-------|----------|-------|----------|-------|
| Fetuin-A                               | 1.48E-01 | 1.58  | 2.31E-01 | 0.47  | 1.41E-01 | 1.85  |
| Fetuin-B                               | 1.41E-03 | 24.86 | 1.93E-03 | 12.89 | 3.39E-03 | 9.27  |
| Complement factor H-related protein 1  | 7.17E-02 | 0.33  | 7.70E-02 | 1.08  | 6.78E-02 | 2.52  |
| Complement factor H-related protein 2  | 3.15E-02 | 0.58  | 2.62E-02 | 1.22  | 2.42E-02 | 2.04  |
| Fibronectin                            | 6.41E-02 | 0.87  | 4.09E-02 | 1.55  | 5.22E-02 | 2.91  |
| Far upstream element-binding protein 3 | 1.54E-02 | 1.84  | 1.01E-02 | 5.09  | 9.64E-03 | 2.59  |
| Gelsolin                               | 7.84E-02 | 1.65  | 7.86E-02 | 1.16  | 8.17E-02 | 1.70  |
| Glutathione peroxidase 3               | 3.38E-02 | 1.77  | 1.21E-02 | 1.44  | 2.80E-02 | 0.61  |
| Histone H2A type 1                     | 8.37E-03 | 5.82  | 3.79E-03 | 7.38  | 8.00E-03 | 2.48  |
| Histone H2B type 2-F                   | 1.37E-01 | 4.57  | 5.89E-02 | 3.80  | 4.70E-02 | 10.27 |
| Histone H4                             | 3.03E-02 | 0.82  | 1.11E-02 | 1.79  | 2.43E-02 | 1.04  |
| Hemoglobin subunit alpha               | 3.50E-02 | 2.14  | 3.24E-02 | 1.75  | 2.49E-02 | 9.96  |
| Hemoglobin subunit beta                | 4.66E-02 | 0.61  | 7.82E-02 | 1.04  | 4.58E-02 | 2.95  |
| Hemoglobin subunit gamma-1             | 1.27E-03 | 27.76 | 4.23E-03 | 5.59  | 1.33E-03 | 2.40  |
| Beta-1B-glycoprotein                   | 8.04E-01 | 1.14  | 9.08E-01 | 0.47  | 8.39E-01 | 0.25  |
| Heparin cofactor 2                     | 4.17E-02 | 1.28  | 4.21E-02 | 1.04  | 5.52E-02 | 0.92  |
| Helicase-like transcription factor     | 2.26E-03 | 8.09  | 7.59E-04 | 2.57  | 1.25E-03 | 2.95  |

|                                              |          |      |          |      |          |      |
|----------------------------------------------|----------|------|----------|------|----------|------|
| Haptoglobin-related protein                  | 9.42E-03 | 2.46 | 8.94E-03 | 1.33 | 8.68E-03 | 0.87 |
| Histidine-rich glycoprotein                  | 4.40E-02 | 1.91 | 4.56E-02 | 2.20 | 3.09E-02 | 1.80 |
| Ig heavy chain V-III region BRO              | 2.32E-03 | 3.03 | 2.74E-03 | 8.46 | 2.84E-03 | 1.81 |
| Plasma protease C1 inhibitor                 | 1.22E-03 | 5.80 | 1.19E-03 | 9.41 | 1.42E-03 | 0.94 |
| Ig alpha-1 chain C region                    | 7.95E-02 | 1.36 | 6.06E-02 | 1.44 | 6.27E-02 | 0.90 |
| Ig delta chain C region                      | 4.23E-03 | 2.57 | 4.76E-03 | 3.58 | 2.97E-03 | 6.21 |
| Ig gamma-1 chain C region                    | 1.01E-01 | 0.38 | 1.20E-01 | 3.85 | 1.12E-01 | 0.56 |
| Ig gamma-2 chain C region                    | 7.82E-02 | 1.80 | 5.72E-02 | 0.55 | 6.59E-02 | 0.62 |
| Ig gamma-3 chain C region                    | 6.42E-02 | 0.24 | 6.71E-02 | 1.70 | 6.82E-02 | 0.38 |
| Ig gamma-4 chain C region                    | 4.18E-02 | 0.68 | 4.69E-02 | 1.54 | 4.69E-02 | 0.92 |
| Ig mu chain C region                         | 1.90E-01 | 0.31 | 1.29E-01 | 2.49 | 1.92E-01 | 0.60 |
| Immunoglobulin J chain                       | 9.19E-03 | 3.20 | 3.41E-03 | 3.31 | 2.93E-03 | 5.02 |
| Ig kappa chain C region                      | 9.63E-02 | 1.09 | 1.12E-01 | 0.72 | 1.22E-01 | 1.09 |
| Inter-alpha-trypsin inhibitor heavy chain H1 | 9.38E-02 | 0.94 | 6.47E-02 | 1.52 | 8.35E-02 | 0.88 |
| Inter-alpha-trypsin inhibitor heavy chain H2 | 2.47E-01 | 1.11 | 2.77E-01 | 1.46 | 2.10E-01 | 0.85 |
| Inter-alpha-trypsin inhibitor heavy chain H4 | 2.73E-01 | 0.04 | 2.29E-01 | 0.54 | 2.38E-01 | 0.52 |
| Kynurenine--oxoglutarate transaminase 3      | 3.40E-03 | 1.86 | 7.41E-03 | 2.68 | 7.45E-03 | 5.13 |

|                                      |          |      |          |       |          |      |
|--------------------------------------|----------|------|----------|-------|----------|------|
| Creatine kinase M-type               | 4.42E-03 | 4.97 | 5.61E-03 | 3.35  | 4.57E-03 | 4.94 |
| Plasma kallikrein                    | 6.45E-02 | 0.62 | 7.48E-02 | 3.55  | 7.57E-02 | 0.27 |
| Kininogen-1                          | 1.56E-01 | 0.84 | 1.16E-01 | 1.23  | 1.47E-01 | 0.14 |
| Ig kappa chain V-I region AG         | 2.25E-03 | 1.86 | 2.69E-03 | 11.27 | 2.13E-03 | 3.33 |
| Ig kappa chain V-I region DEE        | 4.58E-03 | 2.24 | 5.98E-03 | 13.52 | 4.56E-03 | 3.42 |
| Ig kappa chain V-I region Gal        | 2.25E-03 | 1.86 | 2.69E-03 | 11.27 | 2.13E-03 | 3.33 |
| Ig kappa chain V-I region Rei        | 2.25E-03 | 1.86 | 2.69E-03 | 11.27 | 2.13E-03 | 3.33 |
| Ig kappa chain V-II region Cum       | 8.70E-03 | 1.84 | 1.47E-02 | 1.07  | 9.70E-03 | 1.14 |
| Ig kappa chain V-II region GM607     | 8.70E-03 | 1.84 | 1.47E-02 | 1.07  | 9.70E-03 | 1.14 |
| Ig kappa chain V-II region RPMI 6410 | 8.70E-03 | 1.84 | 1.47E-02 | 1.07  | 9.70E-03 | 1.14 |
| Ig kappa chain V-III region B6       | 1.31E-02 | 1.49 | 1.45E-02 | 2.99  | 2.79E-02 | 3.24 |
| Ig kappa chain V-III region SIE/GOL  | 1.03E-02 | 0.97 | 8.91E-03 | 2.99  | 2.01E-02 | 2.36 |
| Ig kappa chain V-IV region Len       | 6.43E-02 | 0.15 | 5.74E-02 | 1.65  | 8.08E-02 | 1.09 |
| Ig lambda chain C regions            | 4.21E-02 | 3.05 | 2.99E-02 | 2.25  | 4.79E-02 | 3.75 |
| Keratan sulfate proteoglycan lumican | 3.23E-03 | 0.98 | 3.43E-03 | 14.75 | 2.81E-03 | 4.03 |
| Lysozyme C                           | 1.20E-01 | 0.16 | 1.30E-01 | 0.69  | 1.28E-01 | 0.69 |
| Myosin-2                             | 4.82E-02 | 1.06 | 4.76E-02 | 0.83  | 4.83E-02 | 1.24 |



|                                     |          |       |          |       |          |       |
|-------------------------------------|----------|-------|----------|-------|----------|-------|
| Myosin-6                            | 2.03E-02 | 1.71  | 2.23E-02 | 0.61  | 2.55E-02 | 1.46  |
| Myosin-7                            | 3.67E-02 | 1.51  | 4.19E-02 | 1.13  | 5.54E-02 | 0.66  |
| Pigment epithelium-derived factor   | 1.63E-02 | 2.94  | 1.15E-02 | 2.05  | 1.61E-02 | 0.80  |
| Platelet factor 4 variant           | 3.48E-01 | 3.01  | 1.46E-01 | 6.99  | 1.03E-01 | 11.73 |
| Peptidoglycan recognition protein 2 | 9.24E-02 | 1.29  | 2.29E-01 | 4.89  | 2.22E-02 | 2.15  |
| Platelet factor 4                   | 3.53E-01 | 2.26  | 1.47E-01 | 4.44  | 9.57E-02 | 13.98 |
| Plasminogen                         | 2.12E-01 | 0.86  | 2.06E-01 | 0.48  | 1.90E-01 | 0.69  |
| Serum paraoxonase/arylesterase 1    | 4.36E-02 | 1.72  | 3.54E-02 | 0.94  | 4.13E-02 | 2.20  |
| Vitamin K-dependent protein C       | 1.71E-02 | 2.58  | 2.01E-02 | 2.43  | 2.34E-02 | 1.65  |
| Vitamin K-dependent protein S       | 4.61E-03 | 1.17  | 2.52E-03 | 3.75  | 4.66E-03 | 2.36  |
| Parotid proline-rich protein 1/2    | 6.72E-05 | 16.19 | 3.61E-05 | 25.59 | 2.12E-04 | 1.76  |
| Retinol-binding protein 4           | 1.47E-01 | 1.16  | 1.79E-01 | 1.12  | 1.31E-01 | 0.57  |
| Serum amyloid A protein             | 7.33E-03 | 1.77  | 8.67E-03 | 1.64  | 8.25E-03 | 2.80  |
| Serum amyloid A-4 protein           | 1.15E-02 | 8.05  | 1.42E-02 | 5.86  | 1.16E-02 | 5.32  |
| 9.5S alpha-1-glycoprotein           | 7.00E-02 | 1.74  | 4.79E-02 | 1.08  | 7.27E-02 | 1.00  |
| Protein transport protein Sec16A    | 4.92E-02 | 0.97  | 1.41E-01 | 7.95  | 4.57E-03 | 3.62  |
| Semenogelin-1                       | 3.51E-02 | 1.57  | 2.77E-02 | 2.69  | 2.70E-02 | 0.62  |

|                              |          |      |          |       |          |      |
|------------------------------|----------|------|----------|-------|----------|------|
| Semenogelin-2                | 3.44E-02 | 1.27 | 3.28E-02 | 0.75  | 3.11E-02 | 0.65 |
| Selenoprotein P              | 9.92E-03 | 6.18 | 9.53E-03 | 3.01  | 1.37E-02 | 0.40 |
| Sex hormone-binding globulin | 6.65E-04 | 1.32 | 5.35E-04 | 17.92 | 8.64E-04 | 7.86 |
| Tetranectin                  | 3.06E-02 | 0.79 | 3.49E-02 | 0.42  | 4.59E-02 | 7.30 |
| Thyroxine-binding globulin   | 1.20E-02 | 3.44 | 1.17E-02 | 0.62  | 1.38E-02 | 1.08 |
| Thioredoxin                  | 1.89E-03 | 4.56 | 1.81E-03 | 25.28 | 2.18E-03 | 2.22 |
| Prothrombin                  | 9.52E-02 | 2.01 | 1.18E-01 | 1.39  | 7.97E-02 | 0.83 |
| Tropomyosin beta chain       | 1.09E-02 | 1.63 | 5.02E-03 | 3.43  | 4.73E-03 | 0.06 |
| Transthyretin                | 1.25E-01 | 0.62 | 1.29E-01 | 1.20  | 1.29E-01 | 1.01 |
| Ubiquitin                    | 5.33E-03 | 2.22 | 5.92E-03 | 2.69  | 6.67E-03 | 3.46 |
| Vitamin D-binding protein    | 4.85E-01 | 0.68 | 4.78E-01 | 0.60  | 4.78E-01 | 0.45 |
| Vitronectin                  | 1.17E-01 | 0.44 | 1.11E-01 | 1.05  | 8.46E-02 | 1.63 |
| Zinc-alpha-2-glycoprotein    | 5.10E-02 | 0.20 | 4.96E-02 | 0.81  | 4.04E-02 | 0.70 |
